# Supplementary material for: Role of MMP-1 (-519A/G, -1607 1G/2G), MMP-3 (Lys45Glu), MMP-7 (-181A/G), and MMP-12 (-82A/G) Variants and Plasma MMP Levels on Obesity-Related Phenotypes and Microvascular Reactivity in a Tunisian Population
Source: Hindawi journal article supplement (doi:10.1155/2017/6198526), 2017-01-01
Supplement: f1 [file 6198526.f1.pdf]

**Supplementary file 1. Estimated haplotype frequencies of MMP-1, MMP-3, MMP-7 and MMP-12 polymorphisms in obese and non-obese subjects.**

| Haplotypes          |                   |                   |                       |                  | Haplotypes [n (%)] |               | OR (95 % CI)     | P value            |
|---------------------|-------------------|-------------------|-----------------------|------------------|--------------------|---------------|------------------|--------------------|
|                     |                   |                   |                       |                  | Non-obese [n (%)]  | obese [n (%)] |                  |                    |
| 2G <sub>-1607</sub> | A <sub>-519</sub> | A <sub>-181</sub> | A <sub>Lys45Glu</sub> | A <sub>-82</sub> | 0.19               | 0.11          | 1                | ---                |
| 2G <sub>-1607</sub> | A <sub>-519</sub> | G <sub>-181</sub> | G <sub>Lys45Glu</sub> | A <sub>-82</sub> | 0.13               | 0.14          | 1.42(0.38-5.28)  | 0.600              |
| 2G <sub>-1607</sub> | A <sub>-519</sub> | G <sub>-181</sub> | A <sub>Lys45Glu</sub> | A <sub>-82</sub> | 0.09               | 0.10          | 1.96(0.51-7.58)  | 0.330              |
| 2G <sub>-1607</sub> | G <sub>-519</sub> | G <sub>-181</sub> | A <sub>Lys45Glu</sub> | A <sub>-82</sub> | 0.03               | 0.09          | 1.05(0.25-8.53)  | <b>0.031</b>       |
| 1G <sub>-1607</sub> | A <sub>-519</sub> | G <sub>-181</sub> | G <sub>Lys45Glu</sub> | A <sub>-82</sub> | 0.03               | 0.06          | 3.67(0.55-24.3)  | 0.180              |
| 1G <sub>-1607</sub> | G <sub>-519</sub> | G <sub>-181</sub> | A <sub>Lys45Glu</sub> | A <sub>-82</sub> | 0.02               | 0.06          | 1.71(0.15-18.90) | 0.660              |
| 1G <sub>-1607</sub> | G <sub>-519</sub> | G <sub>-181</sub> | G <sub>Lys45Glu</sub> | A <sub>-82</sub> | 0.01               | 0.03          | 9.2(4.50-29.8)   | <b>P&lt;0.001*</b> |
| Others              |                   |                   |                       |                  |                    |               |                  |                    |

Significant results (p values) are shown in bold. CI-confidence interval, OR-odds ratio. \*P values remained significant after Bonferroni Correction
